# Supplementary material for: Optimizing depth and type of high‐throughput sequencing data for microsatellite discovery
Source: PubMed Central journal article supplement (PMC6858294; doi:10.1002/aps3.11298), 2019-11-03

**APPENDIX S5.** Relative proportions of di-, tri-, and tetranucleotide simple sequence repeats resolved in the genome (*k*-mer sizes k56 and k64) (A) and transcriptome (B) assemblies.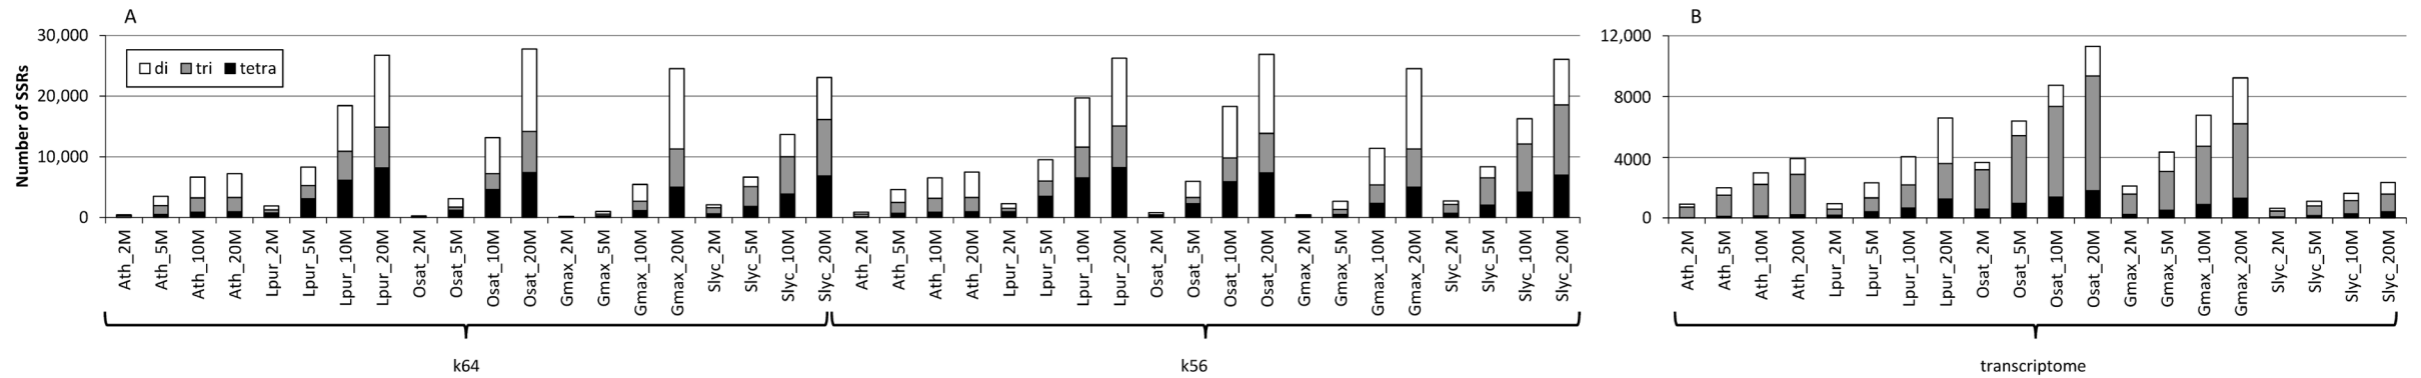

Supplement: APS3-7-e11298-s005.pdf [file APS3-7-e11298-s005.pdf]
