# Supplementary material for: Optimizing depth and type of high‐throughput sequencing data for microsatellite discovery
Source: PubMed Central journal article supplement (PMC6858294; doi:10.1002/aps3.11298), 2019-11-03

**APPENDIX S6.** Results of the tomato primer testing. In silico analysis of primer transferability to two wild tomato species, *Solanum pennellii* (A) and *S. pimpinellifolium* (B); number of alleles for the genome- and transcriptome-derived simple sequence repeat (SSR) markers (C); and the transferability of SSR markers across wild tomato species (D).

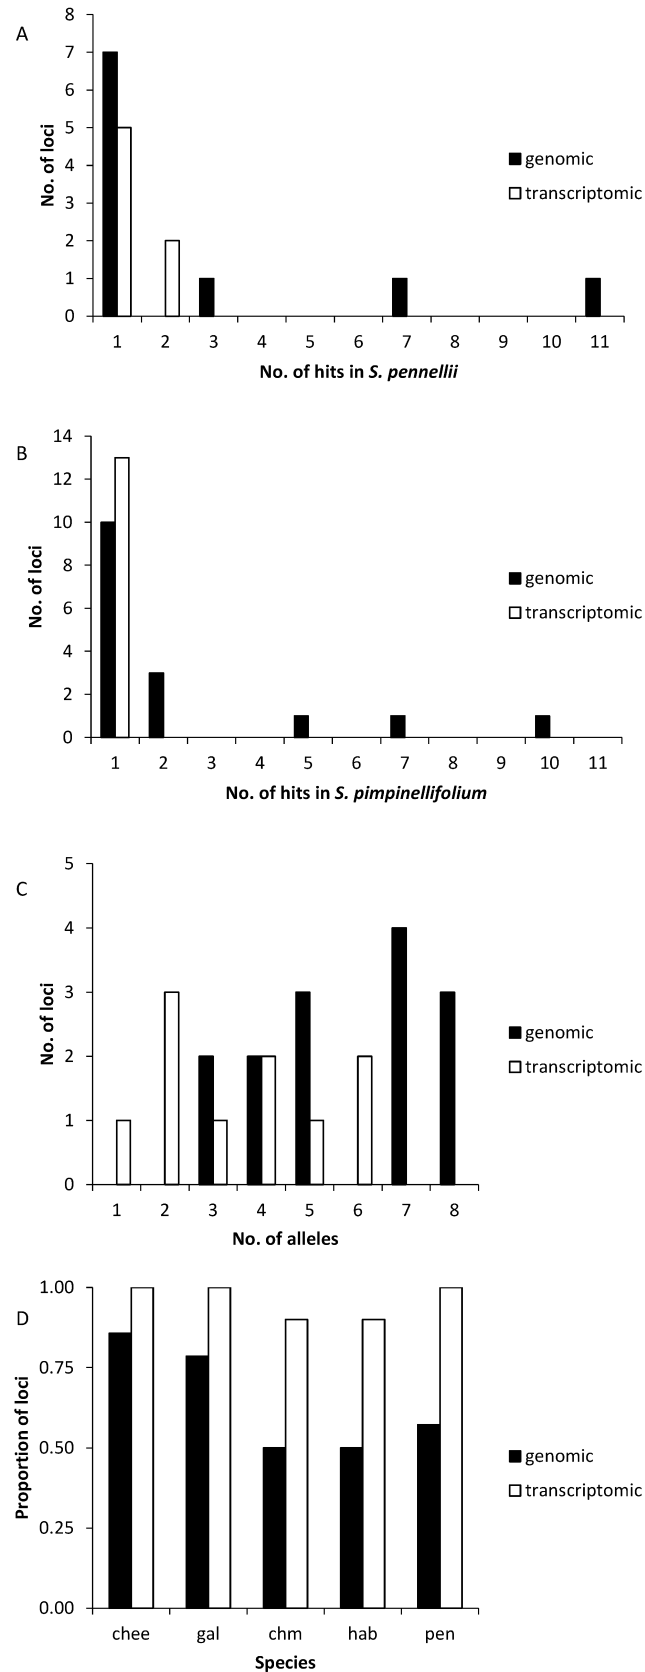

Supplement: APS3-7-e11298-s006.pdf [file APS3-7-e11298-s006.pdf]
