# Supplementary material for: Optimizing depth and type of high‐throughput sequencing data for microsatellite discovery
Source: PubMed Central journal article supplement (PMC6858294; doi:10.1002/aps3.11298), 2019-11-03

**APPENDIX S7.** Principal coordinates analysis of tomato (*lyc*), cherry tomato (*lyccer*), and wild tomato (*pimp*) accessions using simple sequence repeat markers identified in this study.

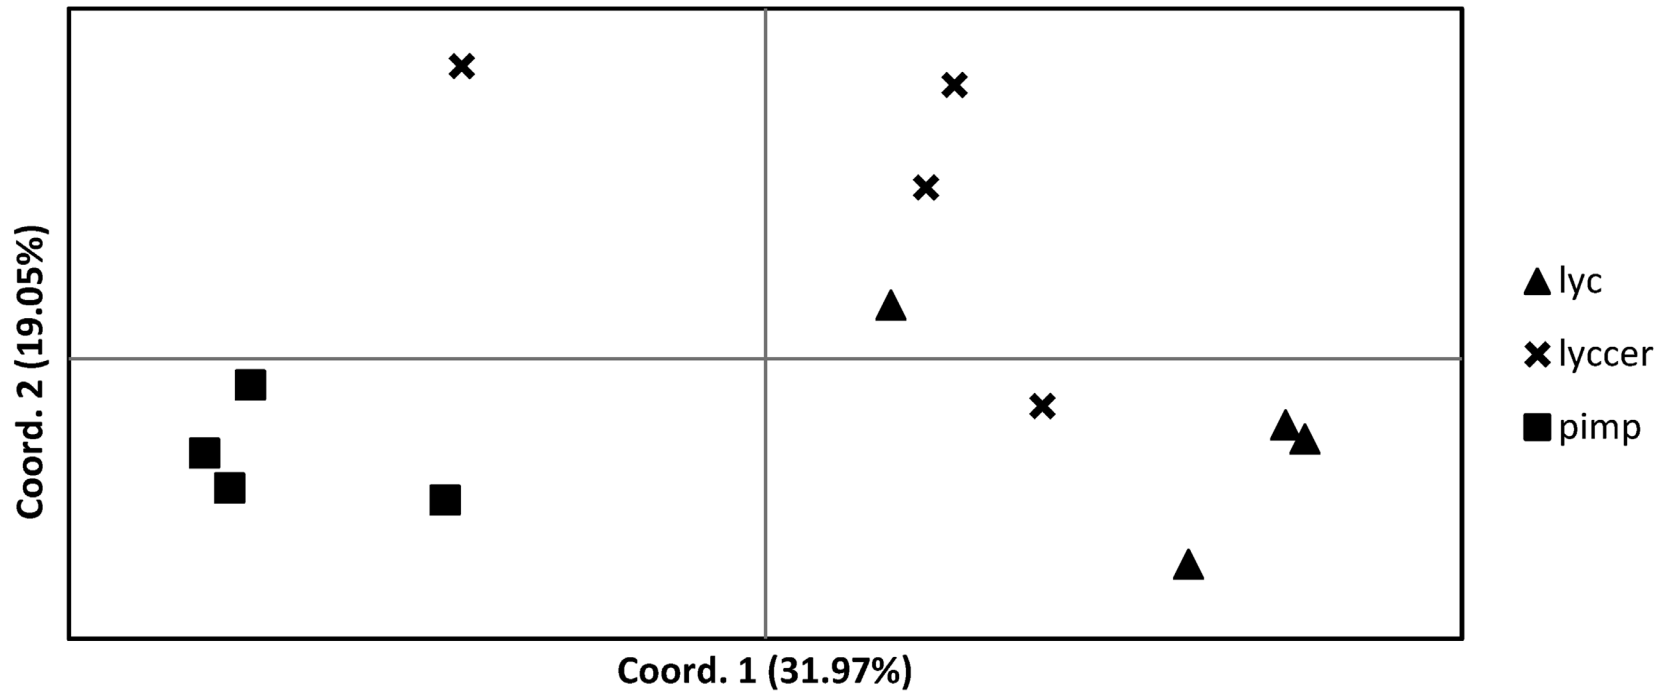

Supplement: APS3-7-e11298-s007.pdf [file APS3-7-e11298-s007.pdf]
